# Supplementary material
Source: publisher site journal article supplement (https://www.spandidos-publications.com/5237/downloadSupplementary)

Figure S1. Hematoxylin and eosin staining of heart, lung and liver tissue taken from the cell derived xenograft model (magnification, x50). NC, negative control; si, small interfering; NC, negative control.

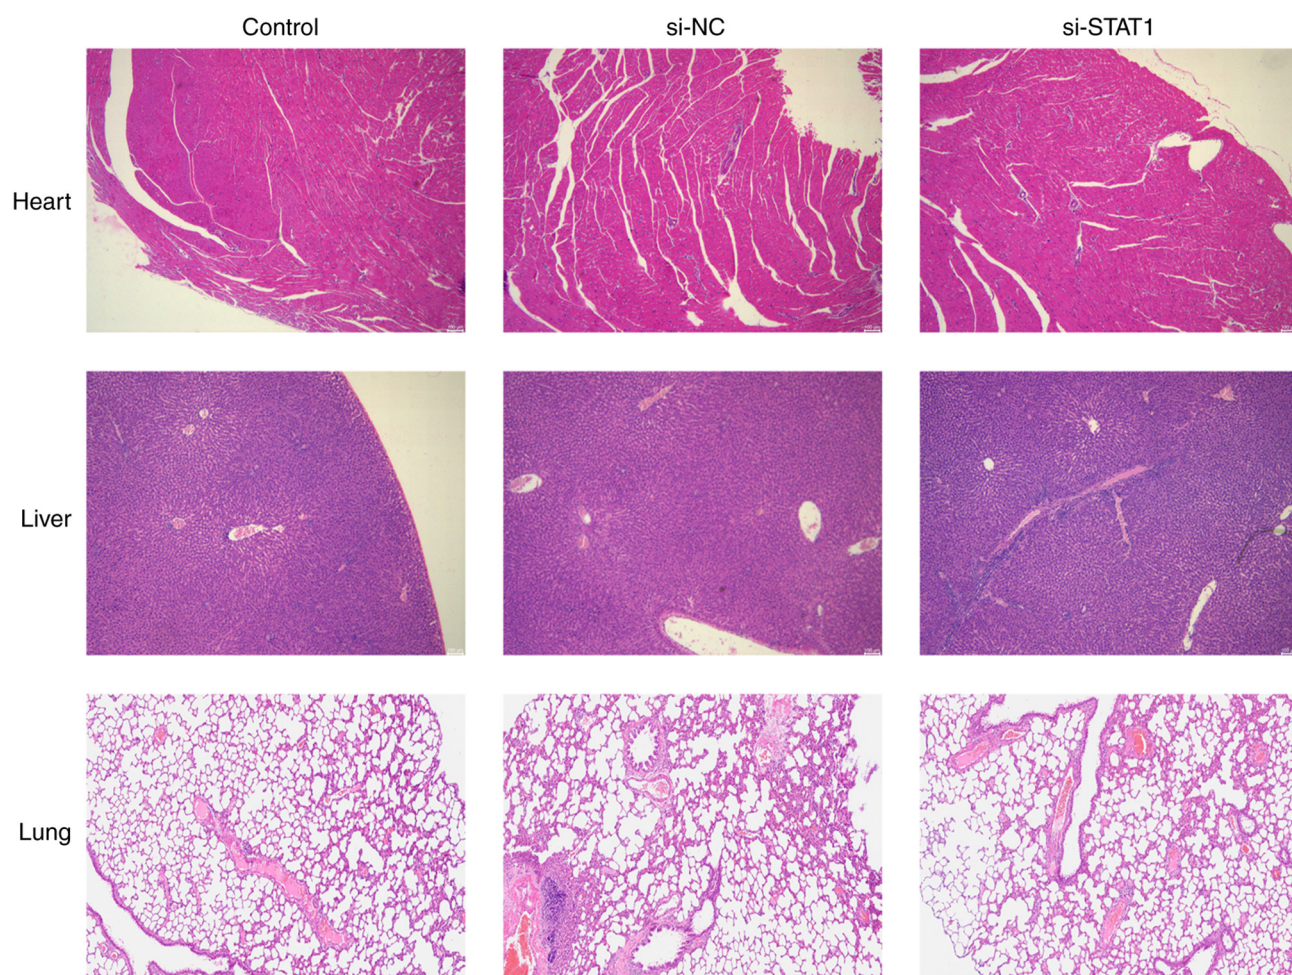

Supplement: Supplementary file 1 [file downloadSupplementary]
